# Supplementary material for: Carbon trading, co-pollutants, and environmental equity: Evidence from California’s cap-and-trade program (2011–2015)
Source: PLoS Med. 2018 Jul 10;15(7):e1002604. doi: 10.1371/journal.pmed.1002604 (PMC6038989; doi:10.1371/journal.pmed.1002604)
Supplement: S2 Data — (XLSX) [file pmed.1002604.s002.xlsx]

## Sheet: oil_and_gas_facility_crosswalk
ARBID	FACID	LATITUDE	LONGITUDE
100904	151532	33.923	-117.862
100994	129497	33.7687	-118.213
100994	800330	33.7501	-118.192
101187	382	35.2731	-119.408
101187	1216	35.3777	-118.999
101460	2622	35.3886	-119.704
101460	3088	35.128	-119.49
101674	3313	34.8292	-120.399
101674	3314	34.8292	-120.399
101674	3316	34.8292	-120.399
101674	3318	34.8292	-120.399
101674	3319	34.8292	-120.399
101674	3320	34.8292	-120.399
101674	3321	34.8292	-120.399
101674	3322	34.8292	-120.399
101674	3323	34.8292	-120.399
101674	3324	34.8292	-120.399
101674	3495	34.9313	-120.406
101674	4104	34.8292	-120.399
101674	4214	34.8292	-120.399
101674	10482	34.9498	-120.429
104011	272	35.9518	-120.872
104012	49	35.3266	-119.658
104012	55	35.6117	-119.725
104012	175	35.1778	-119.577
104012	311	36.1543	-120.403
104012	443	35.3916	-119.203
104012	1127	35.4319	-118.957
104012	1128	35.3541	-119.66
104012	1129	35.2814	-119.59
104012	1131	35.4341	-118.995
104012	1141	35.2166	-119.598
104012	2010	35.6013	-119.708
104012	2149	35.3077	-119.633
104012	2152	35.6172	-119.69
104012	2872	36.1407	-120.36
104012	2885	36.2005	-120.274
104012	3317	35.2944	-118.905
104012	40032	36.2007	-120.382
104012	50046	35.6049	-119.706
104012	50048	35.1782	-119.463
104012	50299	35.397	-119.206
104012	50303	35.616	-119.66
104016	1121	36.1343	-120.388
104016	1135	35.0253	-119.287
104016	1547	35.3758	-119.687
104016	1548	35.4514	-119.719
104016	1699	35.4207	-119.682
104016	3798	35.4464	-119.769
104016	3865	35.4463	-119.733
104018	23	35.9515	-120.858
104029	59	39.4891	-122.037
104029	104	39.8122	-122.213
104029	105	39.8256	-122.094
104029	107	39.8206	-122.179
104029	109	39.802	-122.229
104029	113	39.5413	-122.029
104029	114	39.4573	-122.017
104029	124	39.5765	-122.036
104029	154	39.8075	-122.207
104029	231	39.5949	-122.074
104029	370	37.8728	-121.343
104029	400	39.4962	-122.02
104029	401	39.7934	-122.247
104029	402	39.5111	-122.086
104029	418	39.5409	-122.09
104029	419	39.5327	-122.074
104029	420	39.5735	-122.112
104029	421	39.5645	-122.114
104029	422	39.5655	-122.126
104029	423	39.5471	-122.086
104029	424	39.54	-122.085
104029	426	39.549	-121.977
104029	427	39.5382	-122.095
104029	428	39.5418	-122.09
104029	429	39.5064	-122.052
104029	430	39.5137	-122.065
104029	431	39.4874	-122.051
104029	432	39.5138	-122.08
104029	433	39.5197	-122.093
104029	434	39.5211	-122.086
104029	436	39.5163	-122.05
104029	438	39.53	-122.08
104029	442	39.5382	-122.083
104029	445	39.5193	-122.089
104029	463	39.551	-122.093
104029	465	39.53	-122.081
104029	466	39.5759	-122.099
104029	467	39.5553	-122.087
104029	488	39.5498	-122.074
104029	490	39.5734	-122.101
104029	492	39.5806	-122.091
104029	494	39.5571	-122.083
104029	495	39.559	-122.104
104029	506	39.5202	-122.098
104029	510	39.4891	-122.037
104029	520	39.4395	-122.035
104029	521	39.453	-122.031
104029	523	39.453	-122.031
104029	524	39.4575	-122.031
104029	526	39.453	-122.031
104029	527	39.453	-122.031
104029	530	39.5354	-122.083
104029	531	39.579	-122.122
104029	532	39.5661	-122.083
104029	533	39.5526	-122.083
104029	1007	39.598	-122.392
104029	1011	39.598	-122.392
104029	1015	39.598	-122.392
104029	1020	39.598	-122.392
104029	1022	39.598	-122.392
104029	1032	39.532	-122.084
104029	1037	39.598	-122.392
104029	1047	39.598	-122.392
104029	1051	39.598	-122.392
104029	1054	39.598	-122.392
104029	1056	39.598	-122.392
104029	1057	39.598	-122.392
104029	1064	39.5547	-122.089
104029	1065	39.5452	-122.102
104029	1070	39.5328	-122.089
104029	1087	39.6018	-122.084
104029	1091	39.4379	-122.035
104029	1103	39.5313	-122.08
104029	1108	39.4993	-122.052
104029	1111	39.5287	-122.066
104029	1114	39.5065	-122.051
104029	1118	39.4354	-122.034
104029	1127	39.5914	-122.072
104029	1137	39.5457	-122.089
104029	1139	39.506	-122.061
104029	1140	39.4666	-122.03
104029	1142	39.5477	-122.071
104029	1146	39.7987	-122.264
104029	1149	39.6226	-122.075
104029	1425	38.3224	-121.647
104029	2009	39.0857	-121.851
104029	2052	39.1218	-121.775
104029	2054	39.075	-121.848
104029	2055	39.1499	-121.888
104029	2429	37.865	-121.404
104029	4720	38.1462	-121.667
104029	5208	38.1608	-121.741
104029	5303	38.145	-121.705
104029	5423	38.264	-121.613
104029	5458	38.2641	-121.74
104029	11865	38.0055	-121.635
104030	273	36.0286	-120.103
104030	276	36.0578	-120.121
104030	1326	35.4703	-119.029
104030	1327	35.2003	-119.579
104030	1371	35.4897	-119.856
104030	1737	35.5278	-119.272
104030	1738	35.0189	-119.171
104030	2329	35.5632	-119.446
104030	3271	37.74	-121.426
104030	3906	35.602	-119.358
104030	7281	37.8746	-121.3
104030	50182	35.478	-119.055
104030	50183	35.1	-119.44
104072	68112	33.7628	-118.217
104072	136965	33.752	-118.208
104072	151602	34.0051	-118.145
104072	800325	33.7531	-118.204
104075	150201	33.9364	-118.055
104075	150203	33.9019	-118.275
104075	150209	33.9041	-118.276
104075	150400	33.9224	-117.836
104081	1372	35.3469	-119.651
104081	1641	35.3606	-119.666
104081	3507	35.4032	-119.686
104090	45086	33.8045	-118.159
104090	149297	33.7596	-118.097
104091	1114	35.2238	-119.59
104091	1242	35.7622	-119.046
104091	1630	35.549	-119.662
104091	3755	35.0376	-119.374
104094	1246	35.2529	-119.572
104094	2265	35.1658	-119.372
104094	3585	35.5793	-119.039
104215	1074	34.902	-119.706
104215	1624	35.5219	-119.091
104215	1807	35.5299	-119.086
104215	2058	35.0331	-118.783
104215	2680	35.3117	-119.668
104215	3202	34.9029	-119.699
104215	4034	35.5188	-119.858
104215	8916	34.9021	-119.706
104458	3005	34.837	-120.3
104458	3007	34.837	-120.3
104458	3009	34.837	-120.3
104458	3010	34.837	-120.3
104458	3028	34.837	-120.3
104458	3043	34.8456	-120.322
104458	3512	34.7993	-120.268
104458	3521	34.837	-120.3
104458	3605	34.8217	-120.405
104458	4011	34.859	-120.277
104458	4415	34.837	-120.3
101187	7527	35.3475	-119.125
104012	7295	35.3072	-119.633
104029	60	39.5005	-122.311
104029	219	39.1262	-121.884
104029	417	39.4969	-122.011
104029	425	39.5005	-122.311
104029	491	39.5538	-122.11
104029	515	39.5252	-122.082
104029	1014	39.6438	-122.447
104029	1024	39.6438	-122.447
104029	1029	39.6438	-122.447
104029	1053	39.7461	-122.194
104029	1063	39.7461	-122.194
104029	1072	39.7514	-122.22
104029	1085	39.7461	-122.194
104029	1092	39.7461	-122.194
104029	1095	39.7461	-122.194
104029	1109	39.7461	-122.194
104029	1115	38.7591	-121.27
104029	1154	39.7461	-122.194
104029	1155	39.7461	-122.194
104029	1158	39.7461	-122.194
104029	1159	39.7461	-122.194
104029	1163	39.7461	-122.194
104029	1168	39.7461	-122.194
104029	1169	39.7461	-122.194
104029	1174	39.6438	-122.447
104029	1176	39.6438	-122.447
104029	1177	39.6438	-122.447
104029	1178	39.6438	-122.447
104029	1179	39.6438	-122.447
104029	1180	39.6438	-122.447
104029	1181	39.6438	-122.447
104029	1182	39.6438	-122.447
104029	1183	39.6438	-122.447
100904	151415	33.932	-117.902
104012	1423	35.1855	-119.544
104029	1188	39.5034	-122.036
104029	1189	39.7461	-122.194
104029	1190	39.5457	-122.08
104029	1192	39.5815	-122.101
104029	1193	39.5476	-122.085
104029	4716	38.1431	-121.665
104029	5362	38.2861	-122
104030	3271	37.6588	-121.294
104072	169754	33.6717	-118.014
104075	150214	33.8974	-118.272
104012	3926	35.2831	-119.76
104029	114	38.9723	-121.923
104029	219	39.1046	-121.915
104029	426	39.5482	-122.057
104029	1115	39.5477	-122.071
104029	21796	38.0148	-121.668
104029	21799	38.0174	-121.661
104029	21800	38.0368	-121.987
104029	21802	38.2395	-121.838
104030	8282	35.1713	-119.473
104458	3229	34.8352	-120.299
104458	11289	34.4208	-119.698
104458	11347	34.0106	-118.389
100904	151394	33.9018	-117.829
104012	8084	35.4255	-118.968
104012	8148	35.3419	-119.11
104029	5457	38.1636	-121.731
104029	21961	38.0906	-121.664
104029	21962	38.0715	-121.653
104029	90349	38.3122	-121.898
104030	8452	36.7783	-119.418
104030	8453	36.7783	-119.418
104030	8454	36.7783	-119.418
104072	151594	33.9672	-117.954
104072	151601	33.9553	-117.955
104075	88359	33.7374	-118.088
104075	150235	33.7374	-118.088
104075	172870	33.8995	-117.901
104075	174544	34.0597	-118.456
104458	11334	34.8335	-120.304

## Sheet: metadata
VARIABLE	DESCRIPTION
ARBID	California Air Resources Board (CARB) facility identification code
FACID	Oil and gas facility identifier
LATITUDE	Oil and gas facility location latitude. Datum is WGS84.
LONGITUDE	Oil and gas facility location longitude. Datum is WGS84.
