# Supplementary material for: Carbon trading, co-pollutants, and environmental equity: Evidence from California’s cap-and-trade program (2011–2015)
Source: PLOS journal article supplement (doi:10.1371/journal.pmed.1002604), 2018-07-10
Supplement: S5 (10.1371/journal.pmed.1002604.s005) [file journal.pmed.1002604.s005]

**Table S1: Characteristics of BGs within 1-mile of facilities regulated by California’s cap-and-trade program.**

|                                                                | <b>Within 1 miles of a facility<br/>(N = 1,490 BGs;<br/>N = 2,426,281people)</b> | <b>Beyond 1 miles of a facility<br/>(N = 21,700 BGs;<br/>N = 35,990,955 people)</b> | <b>P-value <sup>a</sup></b> |
|----------------------------------------------------------------|----------------------------------------------------------------------------------|-------------------------------------------------------------------------------------|-----------------------------|
| Median (IQR) population density (people/km <sup>2</sup> )      | 3,297<br>(1540 – 6,505)                                                          | 2,631<br>(1,212 – 4,487)                                                            | <0.001                      |
| Median (IQR) % people of color                                 | 67<br>(41 - 91)                                                                  | 58<br>(33 - 84)                                                                     | <0.001                      |
| Median (IQR) % poor <sup>b</sup>                               | 43<br>(23 - 62)                                                                  | 31<br>(16 - 51)                                                                     | <0.001                      |
| Median (IQR) % low educational attainment <sup>c</sup>         | 20<br>(6 - 39)                                                                   | 13<br>(5 - 28)                                                                      | <0.001                      |
| Median (IQR) % linguistically isolated households <sup>d</sup> | 9<br>(3 - 19)                                                                    | 6<br>(1 - 14)                                                                       | <0.001                      |
| % designated as a disadvantaged community <sup>e</sup>         | 44                                                                               | 23                                                                                  | <0.001 <sup>†</sup>         |

<sup>a</sup> 2-Tailed Mann-Whitney-Wilcoxon test

<sup>b</sup> % of residents living below twice the federal poverty level

<sup>c</sup> % of residents older than 25 years without a high school education

<sup>d</sup> % of population living in households where no one >= age 14 speaks English very well

<sup>e</sup> Based on CalEnviroScreen 3.0 (see main text)

<sup>†</sup> Pearson’s Chi-Squared test with Yates’ Continuity Correctio
