# Supplementary material for: Carbon trading, co-pollutants, and environmental equity: Evidence from California’s cap-and-trade program (2011–2015)
Source: PLOS journal article supplement (doi:10.1371/journal.pmed.1002604), 2018-07-10
Supplement: S7 (10.1371/journal.pmed.1002604.s007) [file journal.pmed.1002604.s007]

**Table S3. Differences in annual average air pollutant emissions from facilities regulated under California's cap-and-trade program by offset usage, 2013-14.** Values are the median (interquartile range) of annual average emissions in metric tonnes.

|                   | <b>Parent company<br/>used offsets<br/>(N= 198 facilities)</b> | <b>Parent company<br/>did not use offsets<br/>(N= 202 facilities)</b> | <b>P-value<sup>a</sup></b> |
|-------------------|----------------------------------------------------------------|-----------------------------------------------------------------------|----------------------------|
| Local GHGs        | 146,000<br>(57,700 – 571,000)                                  | 42,800<br>(27,200 – 82,900)                                           | <0.001                     |
| PM <sub>2.5</sub> | 5.4<br>(2.0, 22.0)                                             | 4.2<br>(2.0, 11.4)                                                    | 0.04                       |
| NO <sub>x</sub>   | 21.3<br>(7.1 – 72.4)                                           | 16.7<br>(5.1 – 58.9)                                                  | 0.18                       |
| SO <sub>x</sub>   | 0.9<br>(0.3, 4.4)                                              | 0.6<br>(0.2, 4.0)                                                     | 0.21                       |
| VOCs              | 2.3<br>(0.8, 9.1)                                              | 4.2<br>(1.1, 17.4)                                                    | 0.002                      |
| Air toxics        | 1.3<br>(0.01 – 18.6)                                           | 0.4<br>(0.02 – 5.3)                                                   | 0.40                       |

<sup>a</sup> 2-Tailed Mann-Whitney-Wilcoxon test
